# Supplementary material for: New Estrone Oxime Derivatives: Synthesis, Cytotoxic Evaluation and Docking Studies
Source: MDPI journal article supplement (doi:10.3390/molecules26092687), 2021-05-04
Supplement: s1 [file s1]

# New estrone oxime derivatives: synthesis, cytotoxic evaluation and docking studies

**Catarina Canário <sup>1</sup>, Mariana Matias <sup>1</sup>, Vanessa de Brito <sup>1</sup>, Adriana O. Santos <sup>1</sup>, Amílcar Falcão <sup>2,3</sup>, Samuel Silvestre <sup>1,4,\*</sup> and Gilberto Alves <sup>1</sup>**

<sup>1</sup> CICS-UBI – Health Sciences Research Centre, University of Beira Interior, Covilhã, Portugal;

<sup>2</sup> Laboratory of Pharmacology, Faculty of Pharmacy, University of Coimbra, Coimbra, Portugal;

<sup>3</sup> CIBIT - Coimbra Institute for Biomedical Imaging and Translational Research, University of Coimbra, Coimbra, Portugal;

<sup>4</sup> CNC – Center for Neuroscience and Cell Biology, University of Coimbra, Coimbra, Portugal.

\* Correspondence: sms@ubi.pt

## NMR Data of Compounds

### 1. Spectra of compound 5

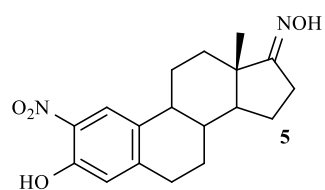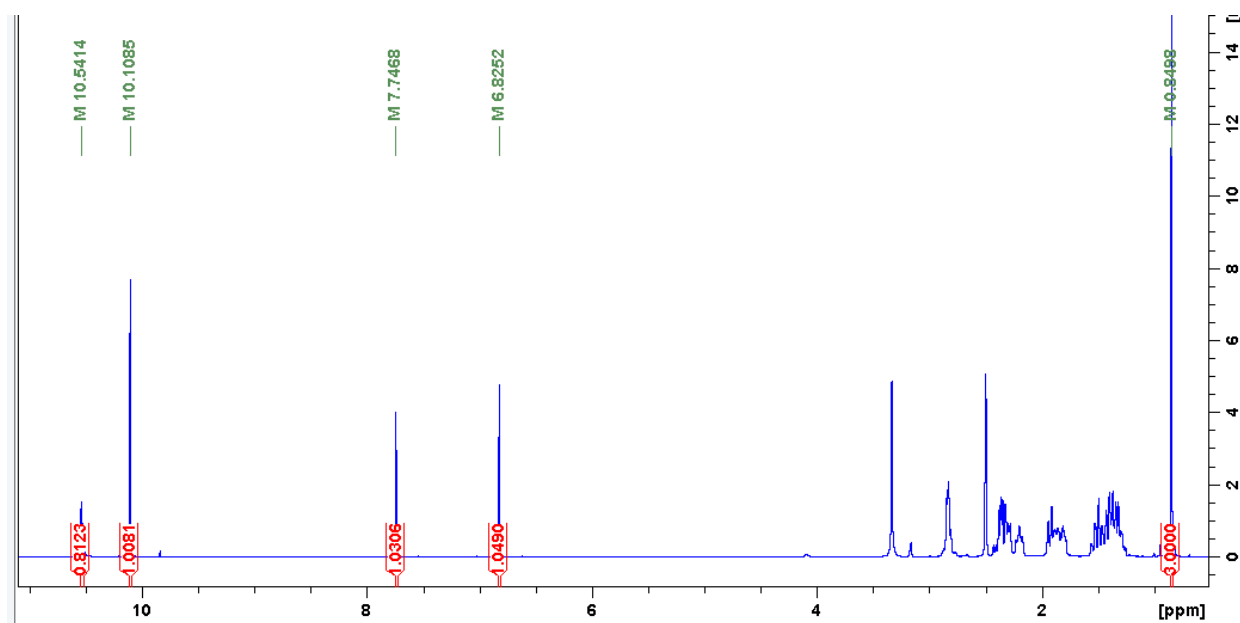

Figure S1. <sup>1</sup>H-NMR spectrum of compound 5 in DMSO-d<sub>6</sub>.

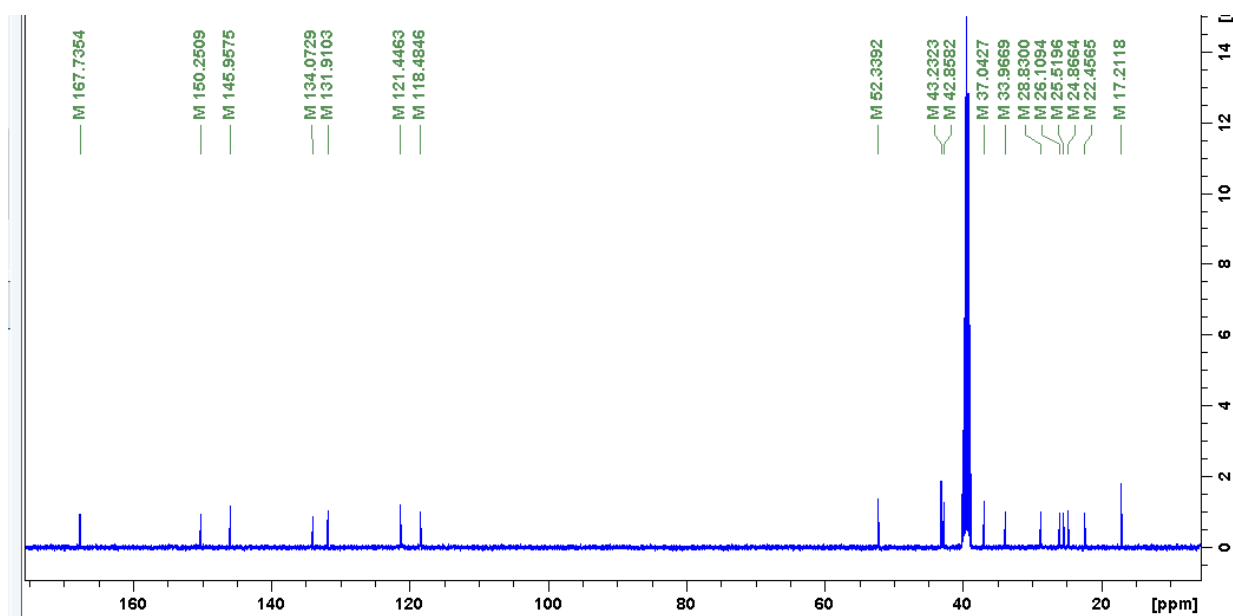

**Figure S2.** <sup>13</sup>C-NMR spectrum of compound **5** in DMSO-d<sub>6</sub>.

## 2. Spectra of compound 6

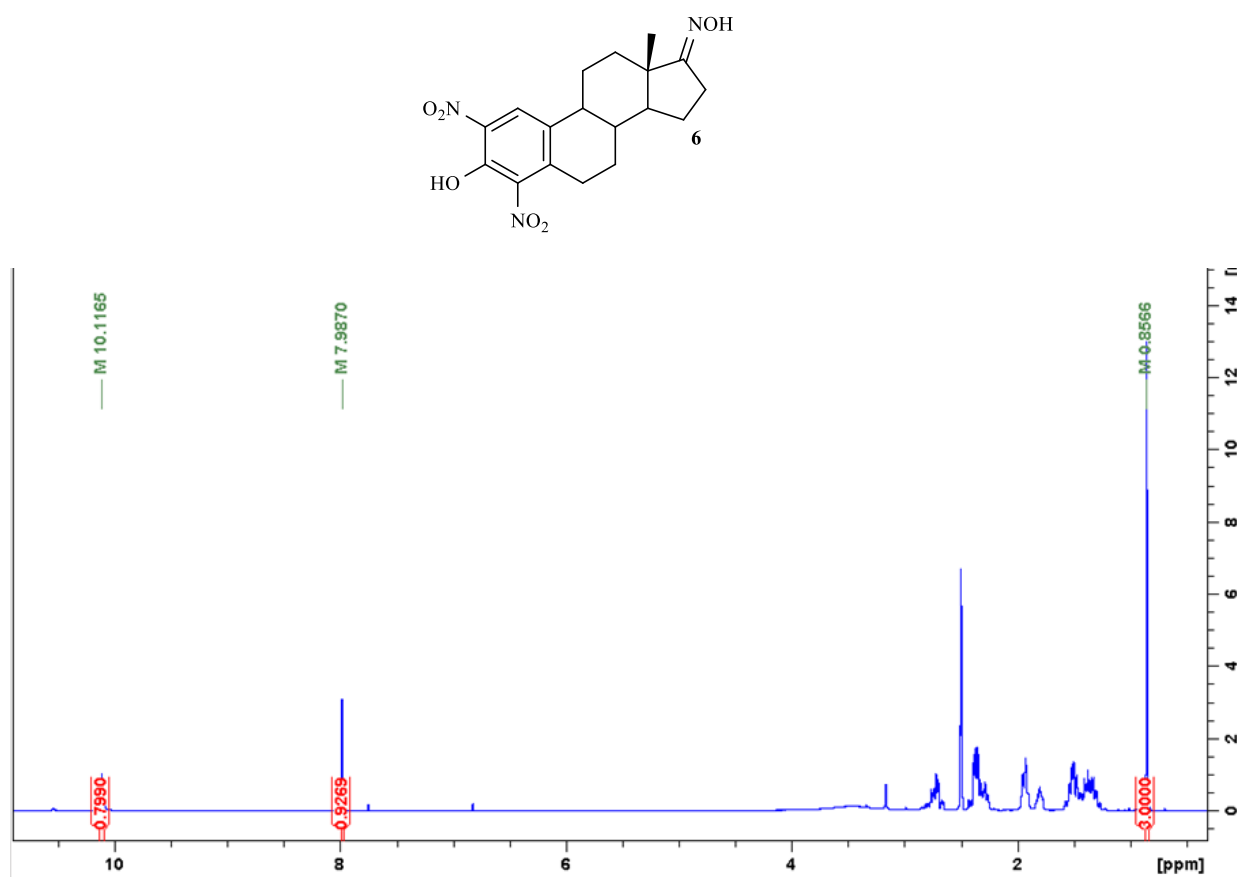

**Figure S3.** <sup>1</sup>H-NMR spectrum of compound 6 in DMSO-d<sub>6</sub>.

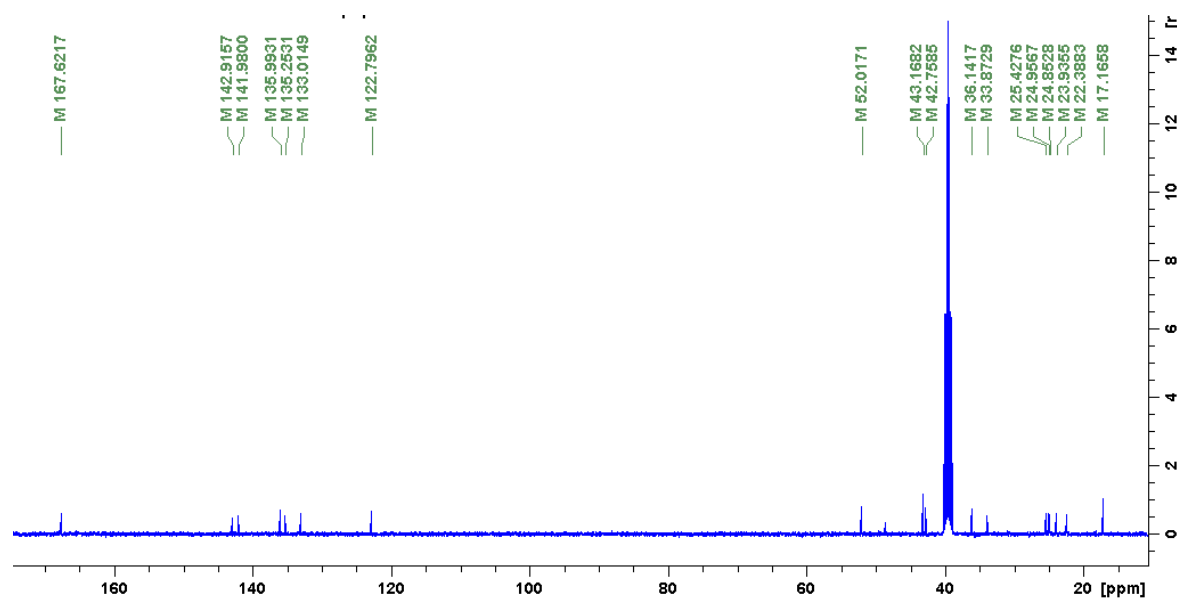

**Figure S4.** <sup>13</sup>C-NMR spectrum of compound 6 in DMSO-d<sub>6</sub>.

### 3. Spectra of compound 10

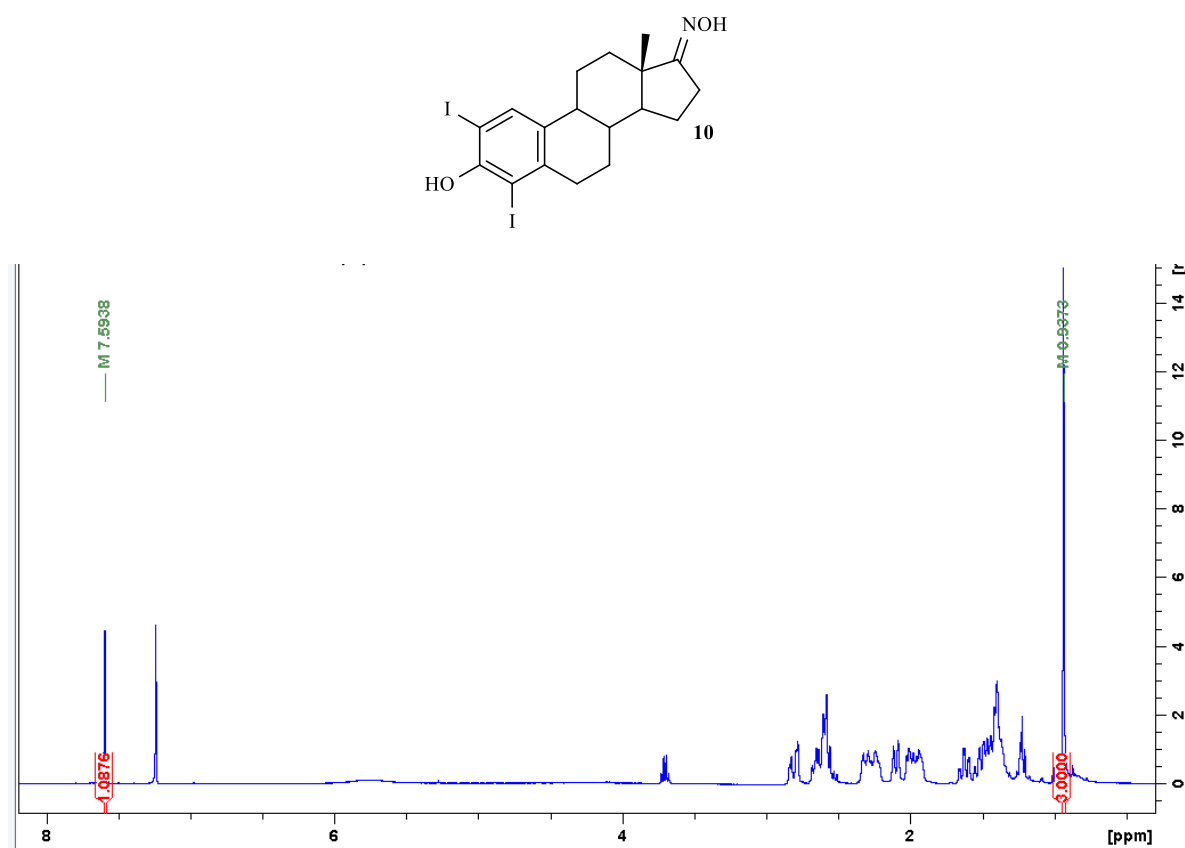

**Figure S5.** <sup>1</sup>H-NMR spectrum of compound 10 in in CDCl<sub>3</sub>.

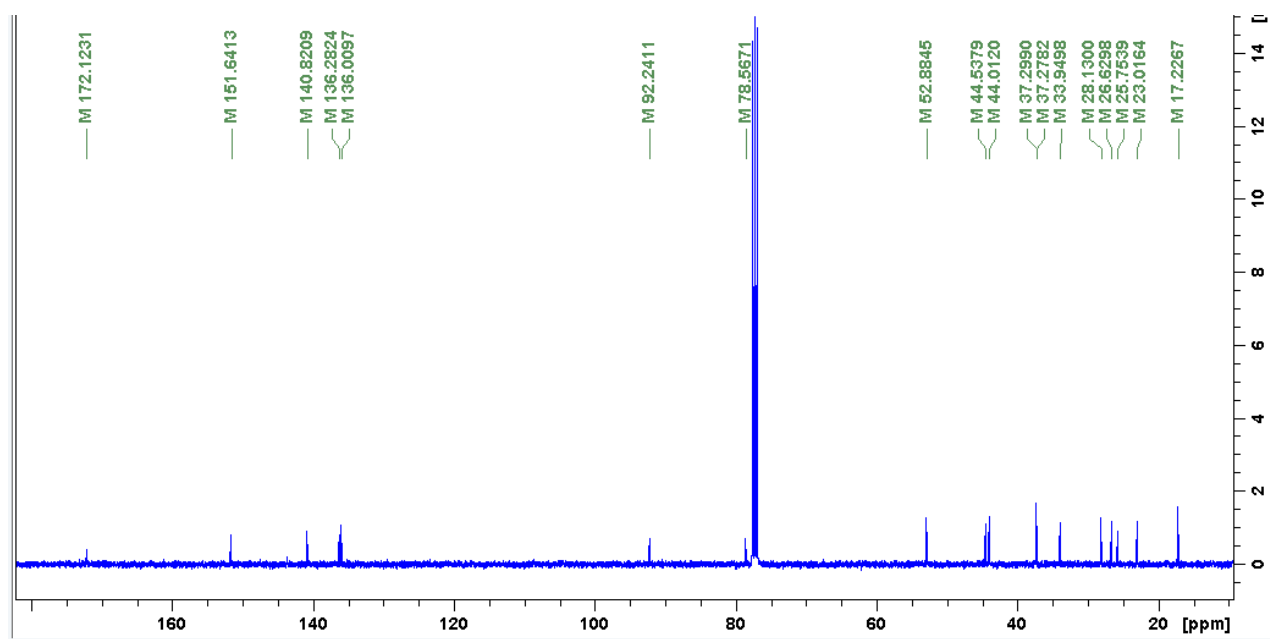

**Figure S6.** <sup>13</sup>C-NMR spectrum of compound 10 in in CDCl<sub>3</sub>.

#### 4. Spectra of compound 11

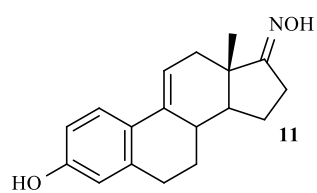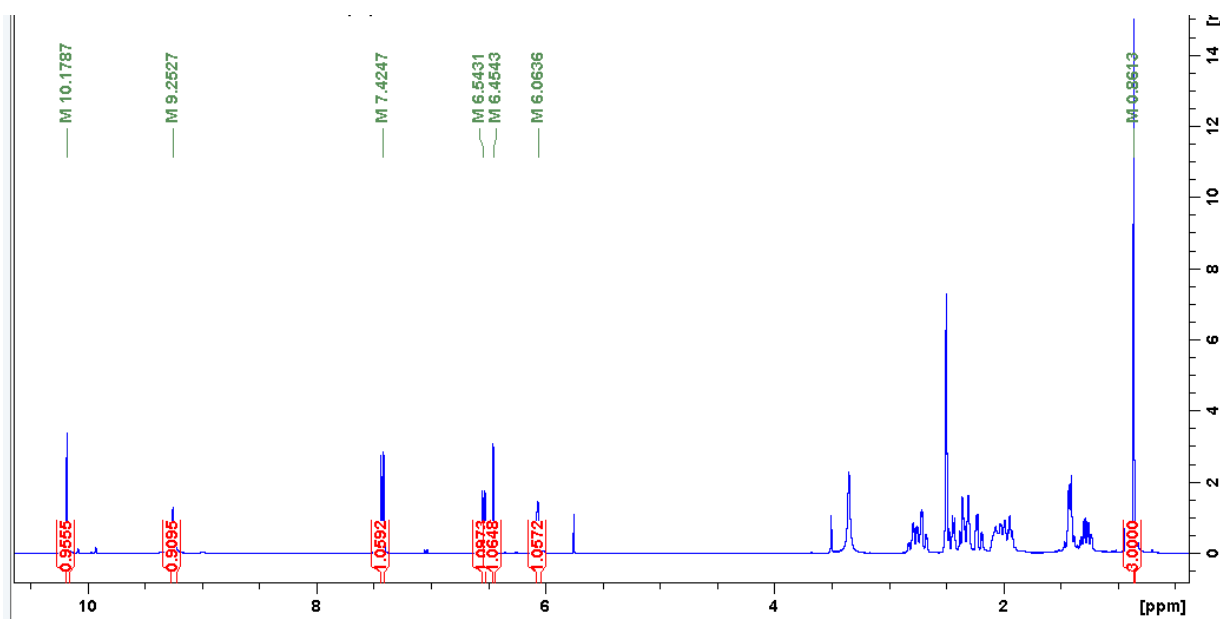

Figure S7. <sup>1</sup>H-NMR spectrum of compound 11 in DMSO-d<sub>6</sub>.



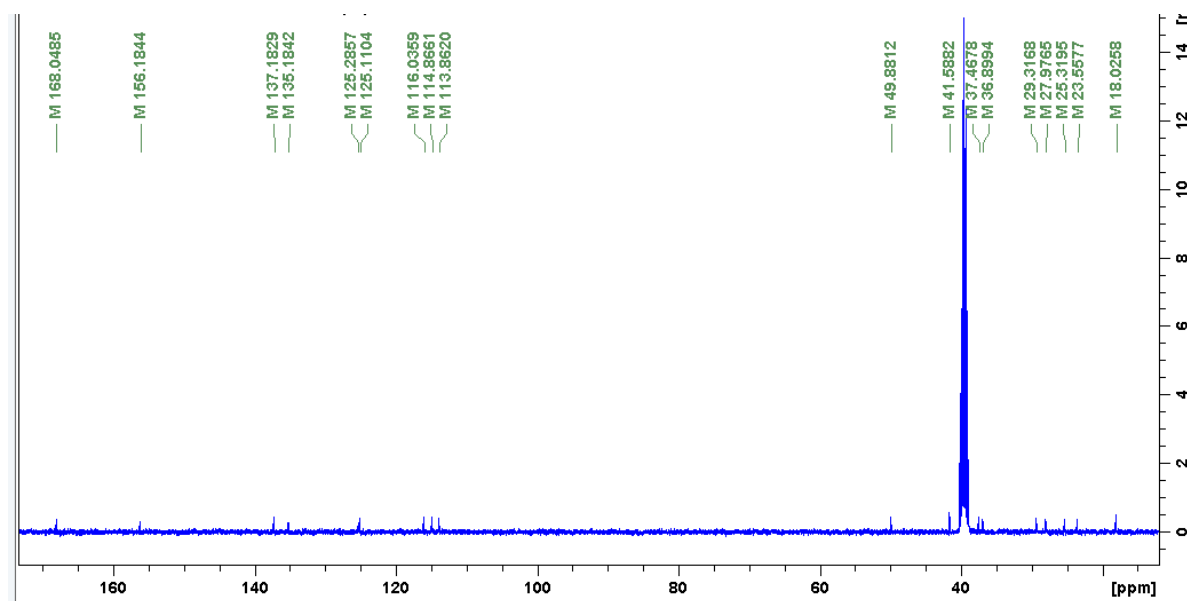

Figure S8. <sup>13</sup>C-NMR spectrum of compound 11 in DMSO-d<sub>6</sub>.

## 5. Spectra of compound 12

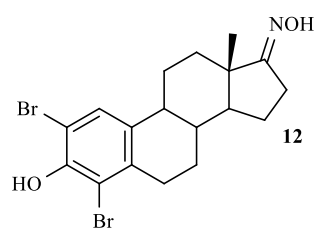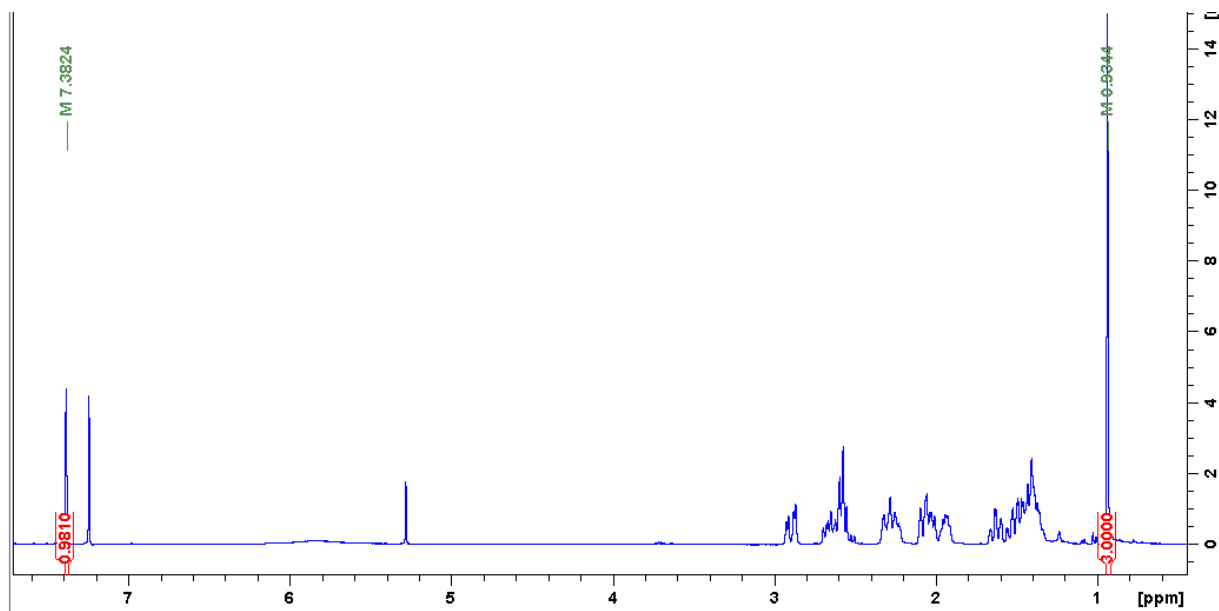

Figure S9. <sup>1</sup>H-NMR spectrum of compound 12 in in CDCl<sub>3</sub>.

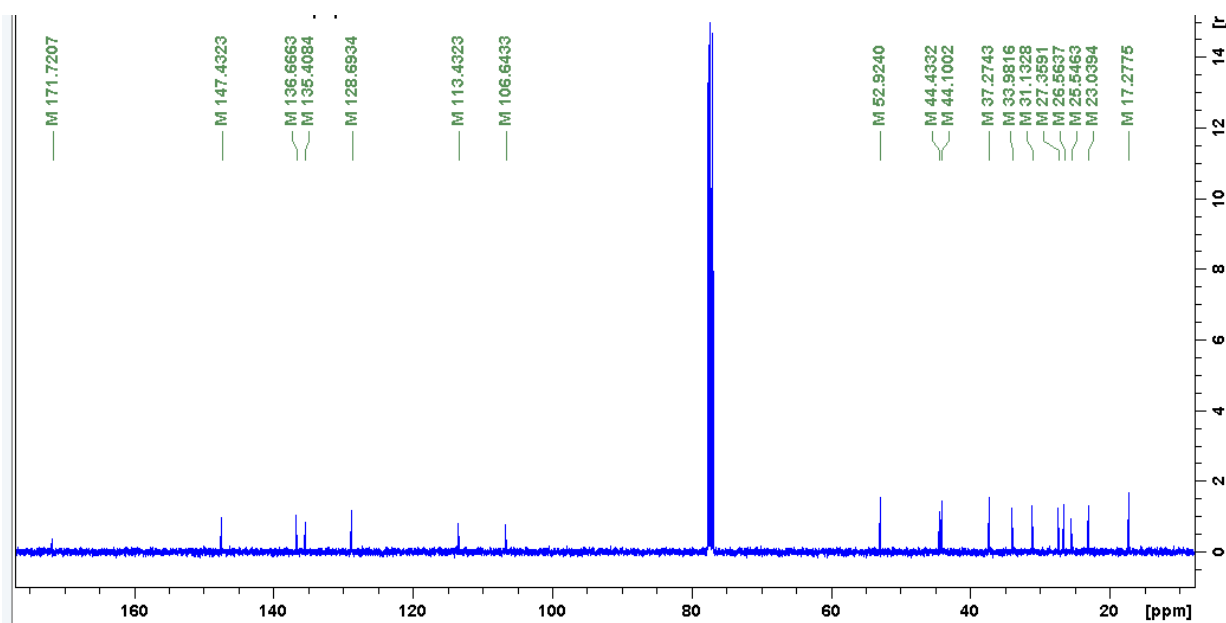

**Figure S10.** <sup>13</sup>C-NMR spectrum of compound **12** in CDCl<sub>3</sub>.
